## RESEARCH ARTICLE

# TGF $\beta$ signaling inhibits goblet cell differentiation via SPDEF in conjunctival epithelium

Heather A. McCauley<sup>1</sup>, Chia-Yang Liu<sup>2</sup>, Aria C. Attia<sup>3</sup>, Kathryn A. Wikenheiser-Brokamp<sup>3,4</sup>, Yujin Zhang<sup>2</sup>, Jeffrey A. Whitsett<sup>3</sup> and Géraldine Guasch<sup>1,\*</sup>

## ABSTRACT

The ocular surface epithelia, including the stratified but non-keratinized corneal, limbal and conjunctival epithelium, in concert with the epidermal keratinized eyelid epithelium, function together to maintain eye health and vision. Abnormalities in cellular proliferation or differentiation in any of these surface epithelia are central in the pathogenesis of many ocular surface disorders. Goblet cells are important secretory cell components of various epithelia, including the conjunctiva; however, mechanisms that regulate goblet cell differentiation in the conjunctiva are not well understood. Herein, we report that conditional deletion of transforming growth factor  $\beta$  receptor II (*Tgfr2*) in keratin 14-positive stratified epithelia causes ocular surface epithelial hyperplasia and conjunctival goblet cell expansion that invaginates into the subconjunctival stroma in the mouse eye. We found that, in the absence of an external phenotype, the ocular surface epithelium develops properly, but young mice displayed conjunctival goblet cell expansion, demonstrating that TGF $\beta$  signaling is required for normal restriction of goblet cells within the conjunctiva. We observed increased expression of SAM-pointed domain containing ETS transcription factor (SPDEF) in stratified conjunctival epithelial cells in *Tgfr2* cKO mice, suggesting that TGF $\beta$  restricted goblet cell differentiation directly by repressing *Spdef* transcription. Gain of function of *Spdef* in keratin 14-positive epithelia resulted in the ectopic formation of goblet cells in the eyelid and peripheral cornea in adult mice. We found that Smad3 bound two distinct sites on the *Spdef* promoter and that treatment of keratin 14-positive cells with TGF $\beta$  inhibited SPDEF activation, thereby identifying a novel mechanistic role for TGF $\beta$  in regulating goblet cell differentiation.

**KEY WORDS:** Conjunctiva, Differentiation, Goblet cells, SPDEF, TGF $\beta$  signaling, Mouse

## INTRODUCTION

The ocular surface epithelia, including the stratified but non-keratinized corneal, limbal, and conjunctival epithelium, in concert with the epidermal, keratinized eyelid epithelium, function together to enable eye health and vision (Swamynathan, 2013). The transparent cornea is essential for vision, and increases in cellular stratification and

keratinization of the cornea result in vision loss or blindness and are associated with many severe ocular surface diseases (Li et al., 2007). The limbus exists at the transition between corneal and conjunctival epithelium, and is a stem cell niche containing limbal stem cells that migrate centripetally to maintain the cornea (Pellegrini et al., 1999; Swamynathan, 2013). Conjunctival epithelium, which encompasses the palpebral conjunctiva, the fornix and the bulbar conjunctiva, lines the inner surface of the eyelid, is composed of stratified epithelium interspersed with goblet cells, and adjoins the cornea at the limbus (Wei et al., 1993, 1997; Pellegrini et al., 1999). Goblet cells are important secretory cell components of various epithelia, including the lung (Park et al., 2007; Chen et al., 2009; Tompkins et al., 2009), the intestine (Radtke and Clevers, 2005) and the conjunctiva (Wei et al., 1993, 1995, 1997; Mantelli and Argueso, 2008). Within the conjunctiva, goblet cells secrete aqueous mucins that protect the surface of the eye by contributing to the tear film to maintain lubrication, clear molecules and maintain mucosal barrier integrity (Wei et al., 1993; Mantelli and Argueso, 2008). Abnormalities in goblet cell function are associated with dry eye syndrome and other drying diseases (Mantelli and Argueso, 2008; Marko et al., 2013; Zhang et al., 2013), and lead to perturbations of the ocular surface epithelium that negatively affect eye health and vision. Mechanisms that regulate goblet cell differentiation in the conjunctiva are not well understood, thereby limiting therapeutic options for ocular surface disorders, such as dry eye syndrome, largely to analgesic measures, such as artificial tears (Corneec et al., 2014).

Although the precise regulatory networks governing goblet cell differentiation in the conjunctiva are unknown, conjunctival phenotypes in murine models have identified Krüppel-like family 4 (KLF4) (Swamynathan et al., 2007; Gupta et al., 2011) and 5 (KLF5) (Kenchegowda et al., 2011), SAM pointed domain-containing ETS transcription factor (SPDEF) (Marko et al., 2013) and the Notch signaling pathway (Zhang et al., 2013) as essential factors required for goblet cell differentiation in the mouse conjunctiva, as deletion of these genes, or inhibition of Notch signaling, results in conjunctiva that lack goblet cells. SPDEF plays a crucial role in goblet cell differentiation in multiple organs, including the lung (Park et al., 2007), the intestine (Gregorieff et al., 2009; Noah et al., 2010) and the conjunctiva (Marko et al., 2013). Although upstream regulators of SPDEF have been reported in the lung (Ren et al., 2013) and the intestine (Aronson et al., 2014), less is known about its upstream regulators in the conjunctiva.

Transforming growth factor  $\beta$  (TGF $\beta$ ) has an established role in controlling epithelial cell proliferation and differentiation (Derynck et al., 1998; Feng and Derynck, 2005). In the presence of TGF $\beta$  ligand, the transmembrane serine/threonine kinases TGF $\beta$  receptor I (TGF $\beta$ RI) and receptor II (TGF $\beta$ RII) heterodimerize to phosphorylate Smad2 (Derynck et al., 1998; Massague and Wotton, 2000). Phosphorylated Smad2 and Smad3 form a heteromeric complex in the cytoplasm with Smad4, the

<sup>1</sup>Division of Developmental Biology, Cincinnati Children's Hospital Medical Center, 3333 Burnett Avenue, Cincinnati, OH 45229, USA. <sup>2</sup>Department of Ophthalmology, Edith J. Crawley Vision Research Center, College of Medicine, University of Cincinnati, Cincinnati, OH 45267, USA. <sup>3</sup>Division of Pulmonary Biology, Cincinnati Children's Hospital Medical Center, 3333 Burnett Avenue, Cincinnati, OH 45229, USA. <sup>4</sup>Pathology and Laboratory Medicine, Cincinnati Children's Hospital Medical Center and University of Cincinnati, 3333 Burnett Avenue, Cincinnati, OH 45229, USA.

\*Author for correspondence (geraldine.guasch@cchmc.org)

common mediator of TGF $\beta$  and bone morphogenetic protein (BMP) signaling, which translocates to the nucleus and directly binds DNA to effect transcription of target genes (Derynck et al., 1998; Massague and Wotton, 2000; McNairn et al., 2013a). BMP signaling, via Smad4, has been implicated in eyelid development and differentiation of the mouse conjunctiva at early stages, but loss of components of canonical TGF $\beta$  signaling failed to produce a perinatal phenotype using *Le-Cre* (Huang et al., 2009). Although TGF $\beta$  signaling is important for corneal epithelial wound healing (Terai et al., 2011), and loss of *Tgfb2* in CD4<sup>+</sup> T cells induces an immune response in the eye (DePaiva et al., 2011), a cell-autonomous function for TGF $\beta$  signaling in conjunctival epithelial cell fate or goblet cell differentiation has not been identified.

Here, we report that conditional deletion of *Tgfb2* in keratin 14 (K14)-positive stratified epithelia causes ocular surface epithelial hyperplasia and conjunctival goblet cell expansion that invaginates into the subconjunctival stroma in the mouse eye. We found that the ocular surface epithelium develops properly in the absence of TGF $\beta$  signaling, but young asymptomatic mice displayed conjunctival goblet cell expansion, demonstrating that TGF $\beta$  signaling is required for restriction of goblet cells differentiation within the conjunctiva. The adult hyperplastic *Tgfb2*-deficient palpebral conjunctiva retained its conjunctival identity but displayed increased SPDEF expression, not only in goblet cells but also in

stratified conjunctival epithelial cells. Overexpression of SPDEF in K14-positive epithelia resulted in the formation of ectopic goblet cells in the eyelid and peripheral cornea in adult mice. We hypothesized that TGF $\beta$  restricted goblet cell differentiation directly by repressing *Spdef* transcription. We found that Smad3 bound two distinct sites on the *Spdef* promoter and that treatment of K14-positive cells with TGF $\beta$  inhibited SPDEF activation, thereby identifying a novel mechanistic role for TGF $\beta$  in the regulation of goblet cell differentiation.

## RESULTS

### *Tgfb2* conditional deletion in K14-expressing cells results in progressive periorbital tissue expansion with narrowing of the palpebral fissure

Murine ocular surface epithelium is derived from K14-expressing cells (Pajoohesh-Ganji et al., 2012; Zhang et al., 2013). Mice that lack *Tgfb2* in stratified epithelia expressing K14 (cKO mice; *K14-Cre* $\times$ *Tgfb2*<sup>fllox/fllox</sup>), including skin, oral and anogenital epithelia, are susceptible to squamous cell carcinoma formation (Lu et al., 2006; Guasch et al., 2007). Here, we report that these mice also develop progressive periorbital tissue expansion with narrowing of the palpebral fissure upon aging. To lineage trace *Tgfb2*-deficient cells in the eye, we backcrossed *K14-Cre* $\times$ *Tgfb2*<sup>fllox/fllox</sup> mice with an eYFP reporter strain (*R26R-eYFP*<sup>fllox-STOP-fllox</sup>) (Srinivas et al., 2001) (Fig. 1A), such that K14-positive epithelial cells, including those of

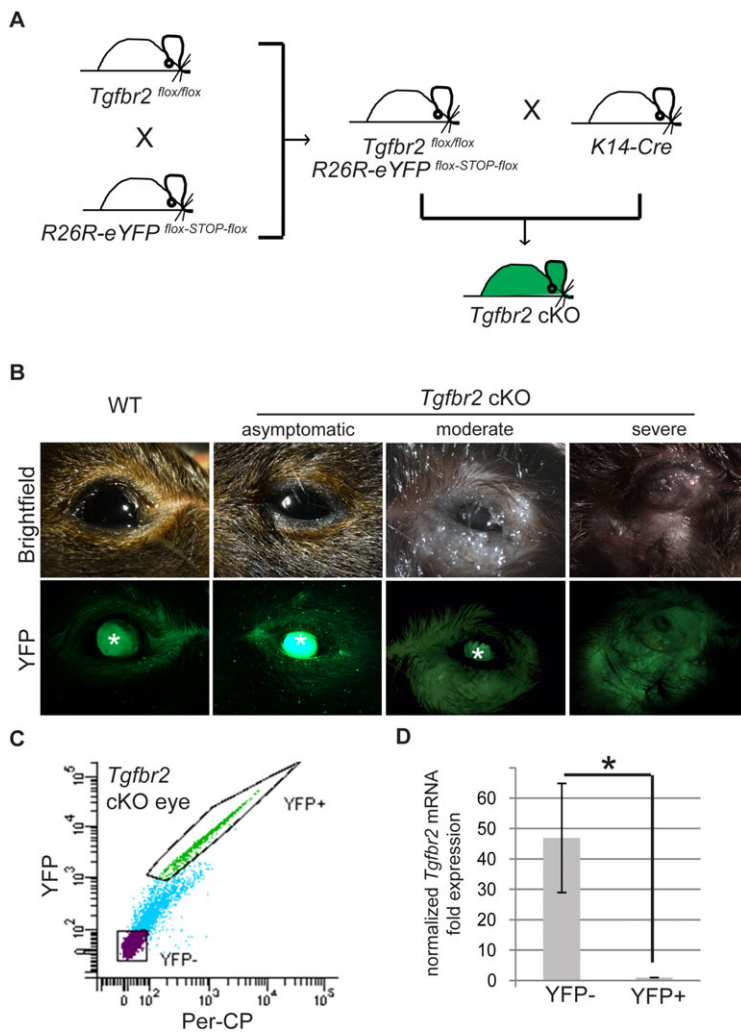

**Fig. 1. *Tgfb2* conditional deletion in K14-expressing cells results in progressive periorbital tissue expansion with narrowing of the palpebral fissure.**

(A) Triple transgenic mice were obtained by crossing *Tgfb2*<sup>fllox/fllox</sup> mice with *R26R-eYFP*<sup>fllox-STOP-fllox</sup> mice and *K14-Cre* mice. (B) External appearance of *K14-Cre* $\times$ *Tgfb2*<sup>fllox/fllox</sup> $\times$ *R26R-eYFP*<sup>fllox-STOP-fllox</sup> wild-type and *K14-Cre* $\times$ *Tgfb2*<sup>fllox/fllox</sup> $\times$ *R26R-eYFP*<sup>fllox-STOP-fllox</sup> (*Tgfb2* cKO) eyes showing representative examples of mice with an asymptomatic, a moderate and a severe phenotype. Asterisks indicate that the lens is autofluorescent. (C,D) YFP-positive and YFP-negative cells were isolated by FACS from dissected eyes of cKO mice and subjected to mRNA extraction and qPCR. Fluorescence in the PerCP channel was used to exclude autofluorescence. Data represent the mean $\pm$ s.d.; Student's *t*-test, \**P*=0.007.

the ocular surface epithelium, lacked *Tgfr2* and expressed YFP (McCauley and Guasch, 2013). The external appearance of juvenile *Tgfr2* cKO eyes, between birth and 8 months of age, appeared indistinguishable from the eyes of age-matched wild-type mice; however, by ~9 months of age, the periocular tissue of *Tgfr2* cKO mice became grossly swollen and enlarged, with excessive mucous discharge and marked narrowing of the palpebral fissure (Table 1 and Fig. 1B). YFP fluorescence was detected in both wild-type (*K14-Cre* × *Tgfr2*<sup>+/+</sup> × *R26R-eYFP<sup>lox-STOP-lox</sup>*) and *Tgfr2* cKO skin and eyelid epithelium, demonstrating efficient targeting by *K14-Cre* (Fig. 1B). We confirmed expression of YFP in the ocular surface epithelium of adult wild-type mice, and verified the normal cell-surface expression pattern of TGFβRII in the basal layer of eyelid, conjunctival and corneal epithelia (supplementary material Fig. S1A–C). *Tgfr2* cKO ocular surface epithelium also expressed YFP, indicating its derivation from K14-expressing cells, but lacked expression of TGFβRII in eyelid, conjunctival and corneal epithelia (supplementary material Fig. S1D–F). Additionally, the loss of *Tgfr2* was directly demonstrated at the mRNA level in YFP-positive cells isolated from *Tgfr2* cKO eyes (Fig. 1C,D), providing evidence that the loss of *Tgfr2* in the ocular surface epithelium caused ocular pathology in these mice.

### ***Tgfr2*-deficient mice develop extensive abnormalities in eyelid, corneal and conjunctival epithelia**

In order to characterize the ocular phenotype, we first assessed the ocular histology of *Tgfr2* cKO mice and age-matched wild-type controls by Hematoxylin and Eosin (supplementary material Fig. S2) and periodic acid-Schiff's (PAS) staining (Fig. 2). The eyelid swelling observed in *Tgfr2* cKO mice was due to marked conjunctival epithelial hyperplasia with epithelial cell nests and epithelial cell-lined cystic spaces invaginating into the underlying stroma (Fig. 2B). Some mice developed a more severe phenotype with additional abnormalities, including thickened, keratinized and/or ulcerated corneal epithelium, thickened eyelid epithelium with parakeratosis and/or hyperkeratosis, and variable occurrence of ectopic goblet cells in the peripheral cornea and squamous eyelid epithelium (Table 1, Fig. 1B, Fig. 2A,B; supplementary material Fig. S2). Given that *Tgfr2* cKO mice are known to be susceptible to squamous cell carcinoma (Lu et al., 2006; Guasch et al., 2007), *Tgfr2* cKO eyes were histologically evaluated for features of malignancy. The invaginating hyperplastic *Tgfr2* cKO conjunctival epithelium lacked dysplastic cytological features and mitotic activity characteristic of squamous cell carcinoma, and the surrounding stroma lacked the desmoplastic

response typical of invasive carcinomas. Furthermore, analysis of LM332 (formerly called kalinin or laminin 5), a basement membrane marker that, when discontinuous, is indicative of invasion (Barsky et al., 1983), revealed a continuous and intact basement membrane throughout the invaginated hyperplastic *Tgfr2* cKO conjunctiva (supplementary material Fig. S3). The histopathology of the *Tgfr2* cKO ocular phenotype shared features with inverted mucoepidermoid papillomas and inverted follicular keratosis, which are benign lesions. By 9 months of age, all *Tgfr2* cKO mice analyzed displayed gross ocular pathology (Table 1). There was a marked increase in goblet cell density at the expense of stratified, non-goblet epithelial cells in the conjunctival fornix of symptomatic *Tgfr2* cKO mice (Fig. 2A',B'). Furthermore, goblet cells in the expanded and invaginated *Tgfr2* cKO conjunctiva expressed Muc5AC (Fig. 2C,D), a mucin normally produced by human and murine conjunctival goblet cells (Mantelli and Argueso, 2008). Taken together, these results suggest that TGFβ signaling may play a previously unidentified role in ocular surface epithelial homeostasis and differentiation.

### ***Tgfr2*-deficient ocular surface epithelia differentiate properly, but *Tgfr2*-deficient conjunctiva begins to invaginate by 6 weeks of age**

To determine whether *Tgfr2* cKO eyes developed normally, we examined expression of ocular surface differentiation markers in asymptomatic 6-week-old mice (Fig. 3). We found no difference between wild-type and *Tgfr2* cKO mice in keratin 10 expression in the skin and eyelid epithelium (Fig. 3A,B) or in keratin 12 expression in the corneal epithelium (Fig. 3C,D). Paired box homeotic gene 6 (*Pax6*), a master regulator of corneal epithelial differentiation (Li et al., 2007), which is essential for maintenance of corneal cell fate (Ouyang et al., 2014), is also normally expressed in *Tgfr2* cKO mice (Fig. 3E,F). Although no difference in keratin 13 expression was observed between wild-type and *Tgfr2* cKO conjunctiva, we found that the *Tgfr2* cKO conjunctiva had keratin 13-positive papillary epithelial hyperplasia in the absence of external symptoms (Fig. 3G,H; supplementary material Fig. S4A,B). Furthermore, we observed an increase in goblet cell density in asymptomatic *Tgfr2* cKO conjunctiva between 6 weeks and 5 months of age, with a paucity of intervening non-goblet cell stratified epithelium, compared with *K14-Cre*-negative littermate conjunctiva (supplementary material Fig. S4C,D). These data demonstrate that, although the ocular surface epithelium develops normally in the absence of TGFβ signaling, TGFβ is required for normal restriction of goblet cell differentiation in the conjunctiva (supplementary material Fig. S4E).

**Table 1. Summary of abnormalities observed in *Tgfr2*-deficient eyes**

| Age                     | Gross phenotype observed (n) | Number of eyes sectioned for detailed analysis | Conjunctival GC expansion and epithelial invagination (%) | Eyelid epithelial thickening, with or without ectopic GCs (%) | Corneal epithelial thickening, with or without ectopic GCs (%) |
|-------------------------|------------------------------|------------------------------------------------|-----------------------------------------------------------|---------------------------------------------------------------|----------------------------------------------------------------|
| <b>Wild type</b>        |                              |                                                |                                                           |                                                               |                                                                |
| 1–8 months              | 0*                           | 3                                              | 0                                                         | 0                                                             | 0                                                              |
| Over 9 months           | 0*                           | 10                                             | 0                                                         | 0                                                             | 0                                                              |
| <b><i>Tgfr2</i> cKO</b> |                              |                                                |                                                           |                                                               |                                                                |
| 1–8 months              | 0                            | 5                                              | 100                                                       | 0                                                             | 0                                                              |
| Over 9 months           | 70                           | 21                                             | 100                                                       | 90.5                                                          | 38                                                             |

Adult *Tgfr2* cKO mice developed progressive periorbital tissue expansion with narrowing of the palpebral fissure with 100% frequency as they aged, whereas wild-type (either *K14-Cre* × *Tgfr2*<sup>+/+</sup> × *R26R-eYFP<sup>lox-STOP-lox</sup>* or *Cre*-negative *Tgfr2*<sup>lox/lox</sup> × *R26R-eYFP<sup>lox-STOP-lox</sup>*) mice never developed an eye phenotype. \*Careful observation of over 100 wild-type mice in the colony from 5 months to 2 years of age. Between birth and 8 months of age, *Tgfr2* cKO mice displayed no gross ocular pathology; however, upon histologic analysis, all mice between 1 month and 8 months of age displayed conjunctival epithelial hyperplasia with invagination into the subconjunctival stroma and conjunctival goblet cell (GC) expansion. As mice aged beyond 9 months, eyelids were swollen due to invaginating conjunctival epithelial hyperplasia deep into the underlying stroma. In 90.5% of cases analyzed, we observed hyperplasia of the eyelid epithelium (see Fig. 4), with or without parakeratosis and/or hyperkeratosis; in 38% of cases analyzed, we observed hyperplasia, keratinization and/or ulceration of the cornea (see Fig. 5). Occasionally, we observed sporadic ectopic goblet cells in the eyelid or peripheral corneal epithelium (see Fig. 2).

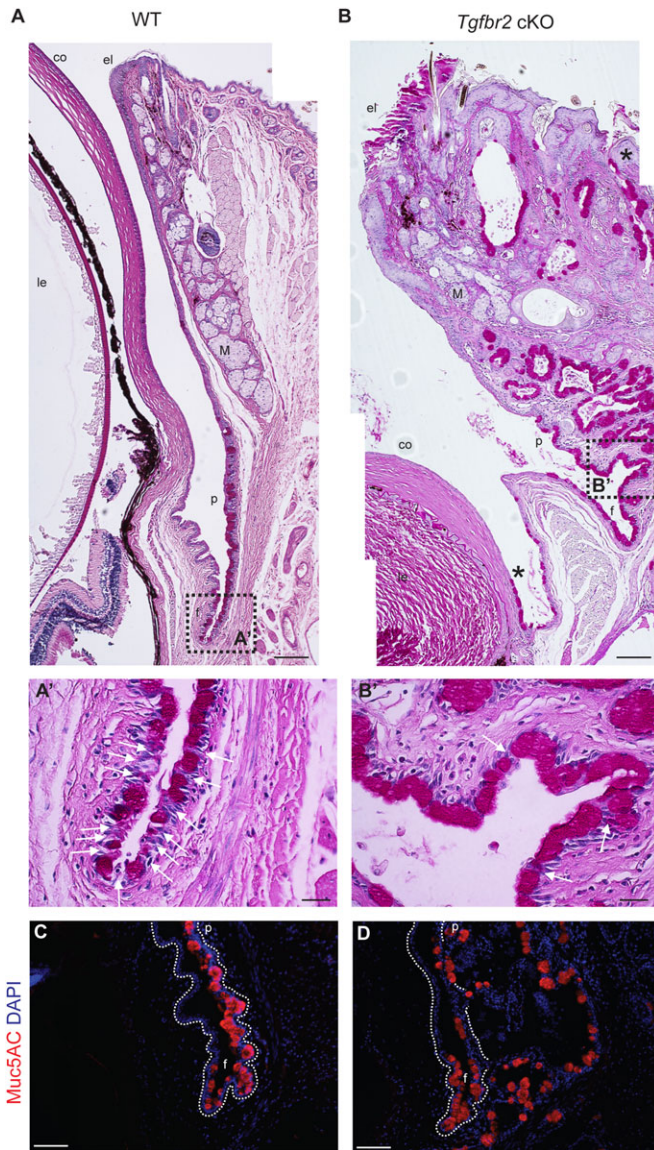

**Fig. 2. *Tgfr2*-deficient mice develop eyelid, corneal and conjunctival epithelial hyperplasia.** (A–B') Combined PAS and Hematoxylin and Eosin staining demonstrated extensive squamous and mucous epithelial hyperplasia with invaginations into the underlying stroma, involving the palpebral conjunctiva, fornix and eyelids of symptomatic *Tgfr2* cKO mice compared with sections of comparable regions from age-matched wild-type mice. Ectopic goblet cells (magenta) were found within *Tgfr2* cKO hyperplastic eyelid epithelium and peripheral corneal epithelium (B, asterisks). Higher magnification of the boxed areas are shown in A' and B'. White arrows indicate non-goblet cell stratified conjunctival epithelial cells interspersed between goblet cells. (C,D) Goblet cells within the expanded and invaginated *Tgfr2* cKO conjunctiva expressed Muc5AC. Dotted lines indicate the basal layer. DAPI counterstains nuclei in blue. co, cornea; le, lens; f, fornix; p, palpebral conjunctiva; M, Meibomian gland; el, eyelid; f, fornix. Scale bars: 100  $\mu$ m in A,B,C,D; 20  $\mu$ m in A',B'.

#### Adult *Tgfr2*-deficient eyelid epithelium is hyperplastic

Although *Tgfr2*-deficient eyes differentiated properly at early stages, we observed marked changes in eyelid, corneal and conjunctival epithelium in adult *Tgfr2* cKO mice (Table 1, Fig. 2; supplementary material Fig. S2). Because TGF $\beta$  is known to regulate epithelial cellular proliferation and differentiation (McNairn et al., 2013a,b), we questioned whether the K14-positive ocular surface epithelia in adult *Tgfr2* cKO mice was hyperproliferative. The eyelid epithelium of

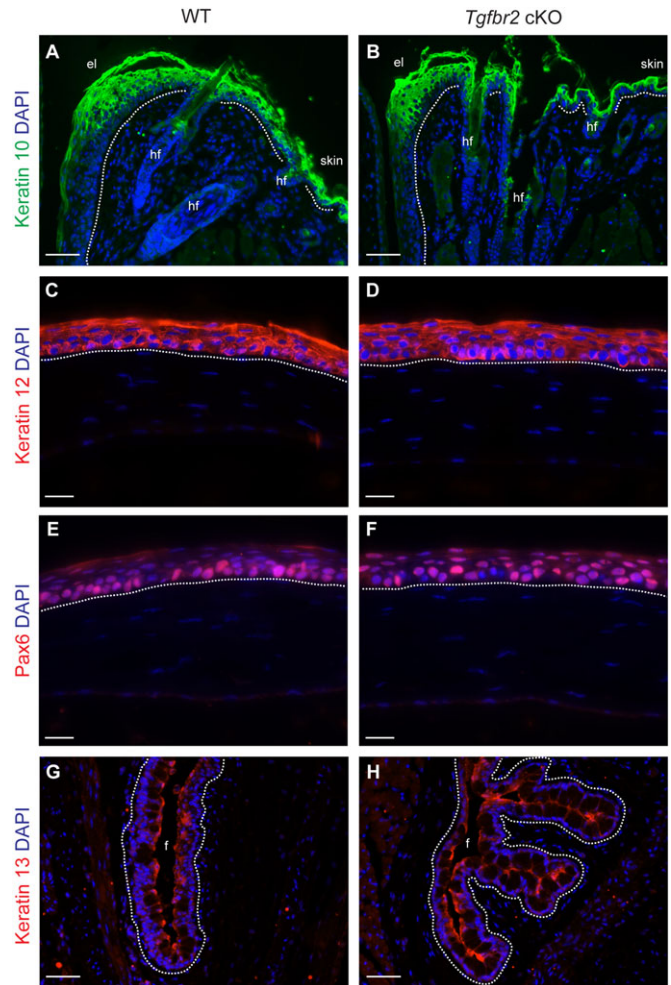

**Fig. 3. *Tgfr2*-deficient ocular surface epithelia differentiate properly.** (A–F) Immunofluorescent staining with antibodies against keratin 10 (A,B), keratin 12 (C,D), Pax6 (E,F) and keratin 13 (G,H) on eyes dissected from 6-week-old mice indicated that the eyelid (A,B), cornea (C–F) and conjunctiva (G,H) developed normally in *Tgfr2* cKO mice. In the absence of external symptoms, the *Tgfr2* cKO conjunctiva was noted to invaginate into the subepithelial stroma by 6 weeks of age (H). Dotted lines indicate the basal layer. DAPI counterstains nuclei in blue. el, eyelid; hf, hair follicle; f, fornix. Scale bars: 50  $\mu$ m in A,B,G,H; 20  $\mu$ m in C–F.

adult *Tgfr2* cKO mice was expanded, containing three to five additional p63-positive basal layers and three to five additional keratin 10-positive suprabasal layers compared with wild-type eyelid epithelium (Fig. 4A–D). Quantification of 5-bromo-2-deoxyuridine (BrdU) staining revealed that *Tgfr2* cKO eyelid epithelium was hyperproliferative, compared with wild type (Fig. 4E–G).

#### The hyperplastic *Tgfr2*-deficient adult cornea becomes keratinized

Of all adult *Tgfr2* cKO mice analyzed, ~38% displayed severely affected corneal epithelium (Table 1). Adult *Tgfr2* cKO mice without severe corneal pathology displayed a reduction in the number of stratified corneal epithelial layers and a weakening of expression of the corneal epithelial marker keratin 12 (Fig. 5A,B). However, in *Tgfr2* cKO mice with severely affected corneal pathology, keratin 12 expression was completely lost in the corneal epithelium, which was associated with an increase in epithelial stratification (Fig. 5C). Loss of keratin 12 expression occurred progressively, beginning with loss of expression in the central cornea as the number of corneal epithelial

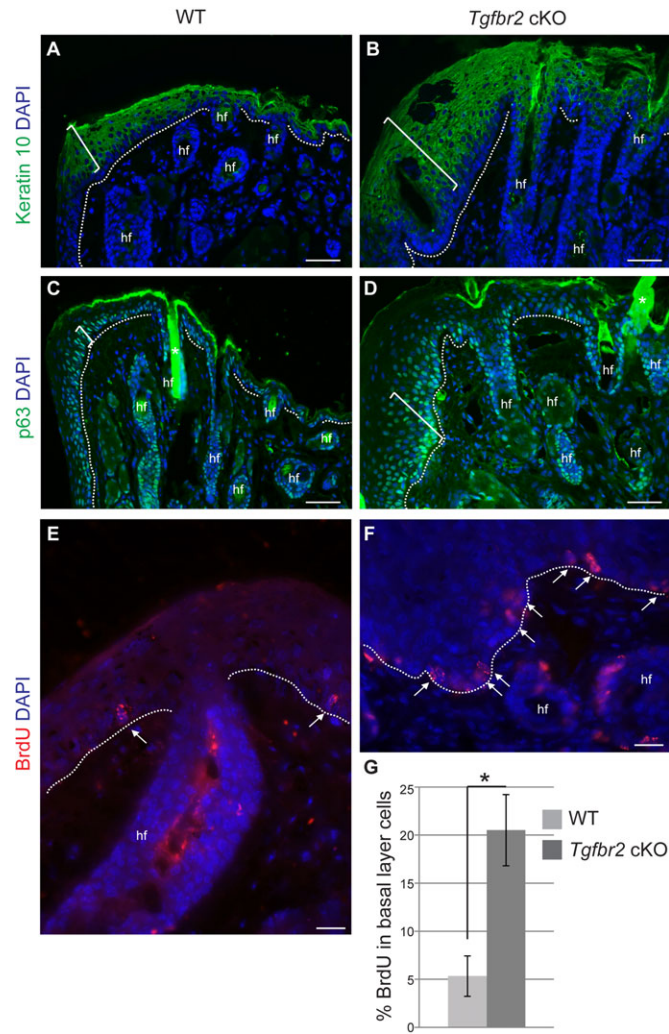

**Fig. 4. The *Tgfr2*-deficient eyelid becomes hyperplastic with age.**

Immunofluorescence staining with antibodies against the suprabasal marker keratin 10 (A,B), the basal marker p63 (C,D) and BrdU (E,F) indicated that the *Tgfr2* cKO eyelid epithelium (B) was hyperplastic with increased epithelial layers (brackets) compared with wild type. (E-G) Quantification (G) of BrdU immunofluorescence staining (E,F, arrows) indicated that the *Tgfr2* cKO eyelid epithelium was hyperproliferative. Data represent the mean number of BrdU-positive cells in relation to total basal epithelial cells  $\pm$  s.d.; Student's *t*-test; \**P*=0.003. hf, hair follicle. Asterisks in C,D indicate autofluorescence originating from the hair shaft. Scale bars: 50  $\mu$ m in A-D; 20  $\mu$ m in E,F.

layers increased (supplementary material Fig. S5). We were interested to see whether the expression of other corneal markers was lost or affected in *Tgfr2* cKO mice. We observed no change in Pax6 expression between wild-type and *Tgfr2* cKO corneal epithelium (Fig. 5D-F), suggesting that Pax6 functions either upstream or independently of the TGF $\beta$  signaling pathway in this context. The murine cornea normally expresses p63 in the basal layer; p63 staining revealed an expansion of the corneal basal layer in severely affected *Tgfr2* cKO mice (Fig. 5G-I). The severely affected *Tgfr2* cKO cornea became keratinized, as the expanded suprabasal layers expressed keratin 10 (Fig. 5L). We did not find any keratin 10 expression in adult wild-type or adult asymptomatic *Tgfr2* cKO corneal epithelium (Fig. 5J,K). Quantification of BrdU staining revealed that severely affected *Tgfr2* cKO corneal epithelia was hyperproliferative compared with wild-type or asymptomatic adult *Tgfr2* cKO (Fig. 5M-P).

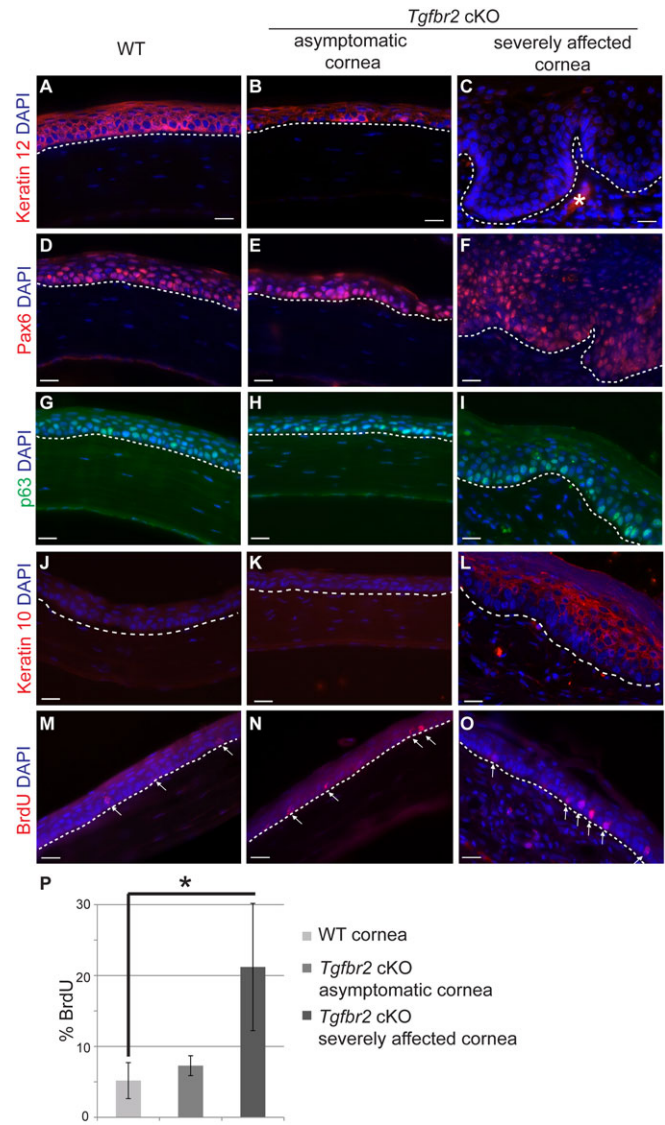

**Fig. 5. The hyperplastic *Tgfr2*-deficient adult cornea becomes keratinized.**

(A-C) Immunofluorescence staining with antibodies against keratin 12 (A-C), Pax6 (D-F), p63 (G-I), keratin 10 (J-L) and BrdU (M-O) indicated that the corneal epithelium of adult *Tgfr2* cKO mice becomes keratinized with increasing phenotypic severity. (M-P) Quantification (P) of BrdU immunofluorescence staining (M-O, arrows) indicated that the severely affected *Tgfr2* cKO corneal epithelium was hyperproliferative compared with wild-type and asymptomatic *Tgfr2* cKO adult corneal epithelium. Data represent the mean number of BrdU-positive cells in relation to total basal epithelial cells  $\pm$  s.d.; Student's *t*-test; \**P*=0.04. Dotted lines indicate the basal layer. Asterisk in C denotes autofluorescence in the stroma. DAPI counterstains nuclei in blue. Scale bars: 20  $\mu$ m.

**The hyperplastic *Tgfr2*-deficient palpebral conjunctiva is hyperproliferative**

The hyperplastic *Tgfr2* cKO conjunctiva retained keratin 13 expression, a marker of normal conjunctival epithelium (Fig. 6A-C). Quantification of BrdU staining indicated that the *Tgfr2* cKO palpebral conjunctival epithelium was hyperproliferative compared with wild-type palpebral conjunctiva (Fig. 6D-F), but there was no significant difference in proliferation in the conjunctival fovea (Fig. 6G-I) between wild-type and *Tgfr2* cKO mice. Quantification of the ratio of BrdU-positive cells to total basal epithelial cells demonstrated that the stratified conjunctival epithelial cells, but not

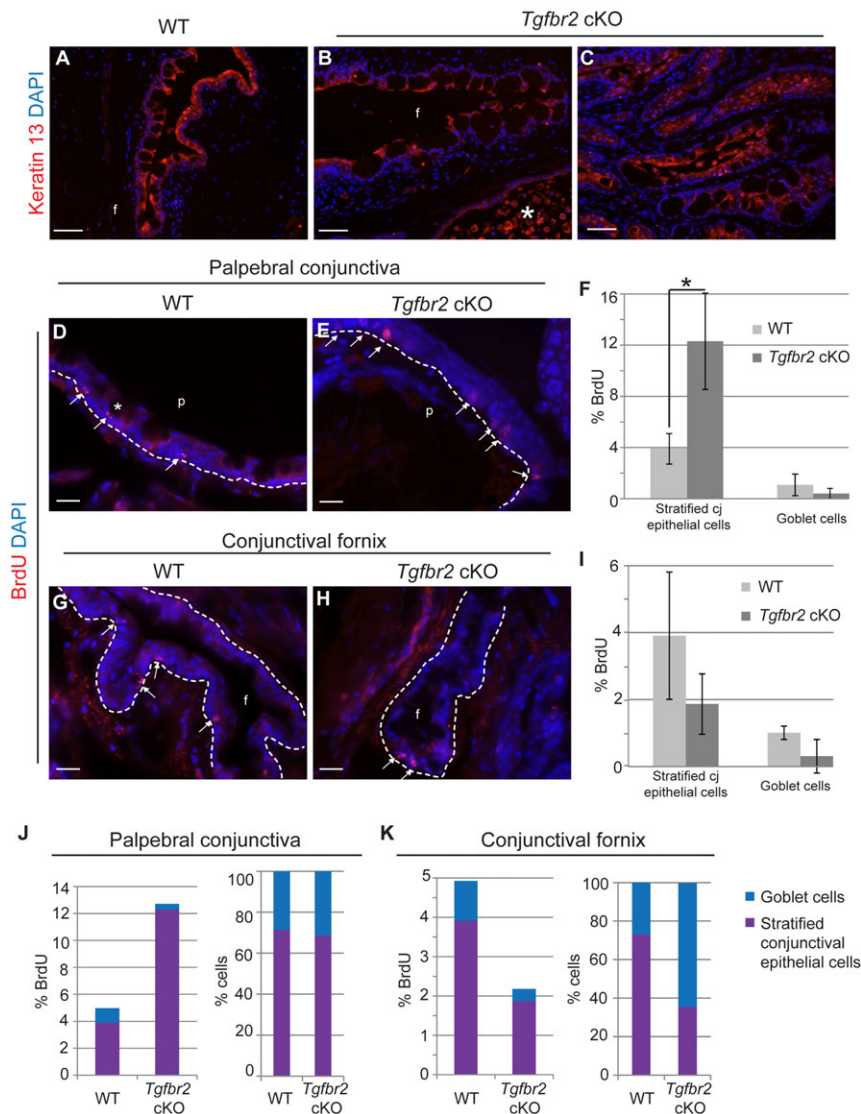

**Fig. 6. *Tgfb2*-deficient stratified conjunctival epithelial cells, but not goblet cells, are hyperproliferative.** (A–C) Immunofluorescence staining with antibodies against keratin 13 (A–C) revealed positive keratin 13 expression in the *Tgfb2* cKO conjunctival epithelium (B), including the hyperplastic conjunctival epithelium (C). (D–I) Quantification (F, I) of BrdU immunofluorescence staining (D, E, G, H, arrows) indicated that the *Tgfb2* cKO palpebral conjunctiva, but not the fornix, was hyperproliferative compared with wild type. (J, K) Quantification of the ratio of BrdU-positive cells to total basal epithelial cells demonstrated that the stratified conjunctival epithelial cells, but not goblet cells, were hyperproliferative in *Tgfb2* cKO palpebral conjunctiva, whereas the ratio of stratified epithelial cells to goblet cells remained unchanged (J). Quantification of the ratio of BrdU-positive cells to total basal epithelial cells in the conjunctival fornix demonstrated no significant difference in proliferation between wild-type and *Tgfb2* cKO mice, whereas the ratio of stratified epithelial cells to goblet cells reflected an expansion of the goblet cell compartment (K). Asterisk in B denotes autofluorescence originating from inflammatory cells. Asterisk in D indicates a rare BrdU-positive goblet cell. Data represent the mean number of BrdU-positive cells in relation to total basal epithelial cells  $\pm$  s.d.; Student's *t*-test; \**P*=0.02. cj, conjunctival; p, palpebral conjunctiva; f, conjunctival fornix. Scale bars: 50  $\mu$ m in A–C; 20  $\mu$ m in D, E, G, H.

goblet cells, were hyperproliferative in *Tgfb2* cKO palpebral conjunctiva, whereas the ratio of stratified epithelial cells to goblet cells was unchanged (Fig. 6J). Conversely, quantification of the ratio of BrdU-positive cells to total basal epithelial cells in the conjunctival fornix revealed no significant difference in proliferation between wild-type and *Tgfb2* cKO mice, whereas the ratio of stratified epithelial cells to goblet cells reflected an expansion of the goblet cell compartment (Fig. 6K). The lack of BrdU-positive goblet cells indicated that the increase in goblet cell density observed in the *Tgfb2* cKO conjunctiva was a result of aberrant differentiation rather than goblet cell proliferation.

#### The hyperplastic *Tgfb2*-deficient stratified palpebral conjunctiva exhibits increased SPDEF expression associated with the goblet cell expansion

We next sought to identify whether the hyperplastic conjunctival epithelium invaginating into the subconjunctival stroma of *Tgfb2* cKO mice retained normal conjunctival identity. We confirmed that *Tgfb2* cKO conjunctiva, despite the expansion and marked abundance of goblet cells, expressed normal markers of conjunctival epithelium, including keratin 13 (Fig. 6A–C), KLF5 (Fig. 7A–C) and SPDEF (Fig. 7D–F). Interestingly, although KLF5 staining appeared consistent between wild-type and *Tgfb2* cKO conjunctiva, SPDEF

staining appeared markedly increased in the nuclei of goblet cells, as well as abundantly expressed in the nuclei of interspersed stratified cells in the hyperplastic *Tgfb2*-deficient conjunctival epithelium (Fig. 7D–F). We confirmed that *Spdef* mRNA expression was significantly increased in *Tgfb2*-deficient conjunctival epithelium isolated by laser-capture microdissection (Fig. 7G–I). These data suggest that the increased conjunctival stratified epithelial SPDEF expression may promote goblet cell expansion in *Tgfb2*-deficient mice.

#### Overexpression of SPDEF in K14-positive epithelium results in ectopic goblet cell formation and upregulation of goblet cell-associated genes

To test whether epithelial expression of SPDEF was sufficient to drive goblet cell differentiation in the ocular surface epithelia, we bred mice to express SPDEF in all K14-positive cells, including those of the ocular surface epithelia, in a doxycycline-inducible manner (*K14-rtTA* × *TRE2-Spdef*) (Fig. 8A). When doxycycline was administered continuously from birth, *K14-rtTA* × *TRE2-Spdef* mice displayed growth retardation compared with *K14-rtTA* littermates, and died by 3 weeks of age. Analysis of these mice at postnatal day 18 (P18) revealed abundant nuclear SPDEF expression in skin, eyelid and conjunctival epithelium, and patchy expression in the

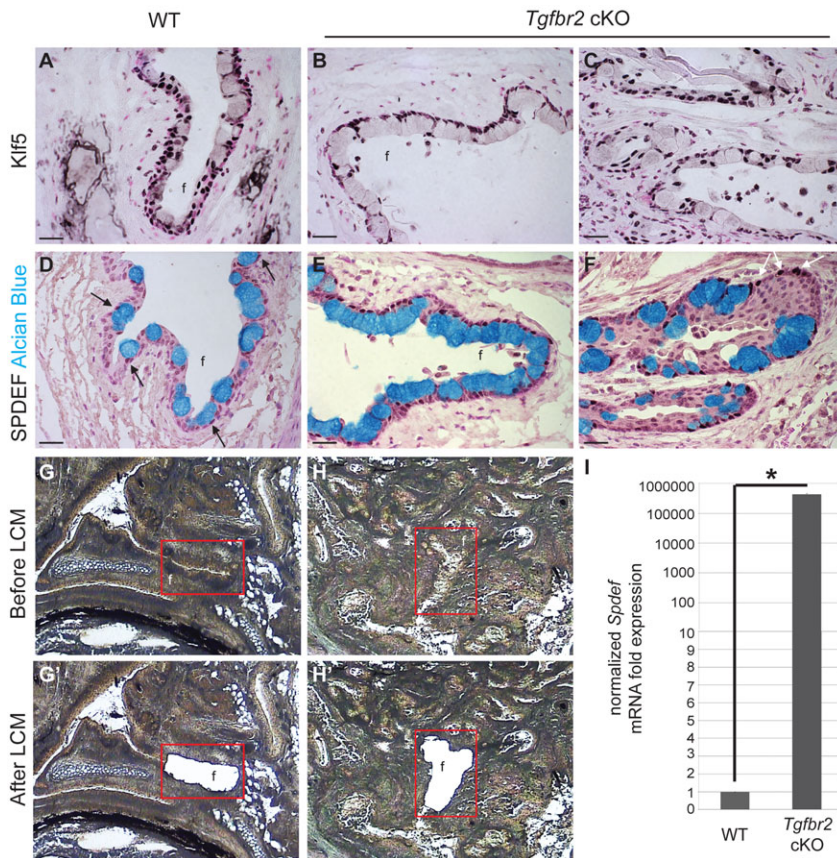

**Fig. 7. The hyperplastic *Tgfb2*-deficient conjunctiva exhibits increased SPDEF expression associated with the goblet cell expansion.** (A–C) Immunohistochemistry on the conjunctival epithelium in wild-type (A) and *Tgfb2* cKO mice (B), and the invaginated conjunctival epithelium within the subepithelial stroma of *Tgfb2* cKO eyes (C) showed similar expression of KLF5. (D–F) Alcian Blue-positive goblet cells within the conjunctiva of wild-type mice expressed SPDEF (D, black arrows). Alcian Blue-positive goblet cells (black arrows), as well as some stratified Alcian Blue-negative epithelial cells (white arrows) within the conjunctiva (E) and the epithelial invaginations (F) of *Tgfb2* cKO mice strongly expressed SPDEF. Nuclear Fast Red stains all nuclei in red. Scale bars: 20  $\mu$ m. (G–H') Conjunctival fornix (G,H) from wild-type (G,G') and *Tgfb2* cKO (H,H') mice were subjected to laser-capture microdissection and RNA extraction. (I) *Tgfb2* cKO conjunctival epithelium expressed *Spdef* over 400,000 fold more than in wild type. Data represent the mean  $\pm$  s.d.; Student's *t*-test, \**P*=0.00006. f, fornix.

corneal epithelium in *K14-rtTA* $\times$ *TRE2-Spdef* mice compared with *K14-rtTA* alone; however, no additional or ectopic goblet cells were found outside the conjunctiva, and no changes in goblet cell density in the conjunctiva were observed (supplementary material Fig. S6). Doxycycline-induced SPDEF expression in adult mice, from P30 to P42 or from P120 to P148, resulted in an overt phenotype in *K14-rtTA* $\times$ *TRE2-Spdef* mice, which is characterized by progressive periorbital tissue expansion with narrowing of the palpebral fissure (supplementary material Fig. S7A), reminiscent of the external phenotype observed in *Tgfb2* cKO mice (Fig. 1). We found increased goblet cell density in the palpebral conjunctiva and conjunctival fornix of doxycycline-induced adult *K14-rtTA* $\times$ *TRE2-Spdef* mice compared with *K14-rtTA* littermates (Fig. 8B,C), suggesting that the level of SPDEF expression in the conjunctiva may correlate with goblet cell density. We confirmed abundant nuclear expression of SPDEF in K14-positive epithelia of doxycycline-induced adult *K14-rtTA* $\times$ *TRE2-Spdef* mice, including the skin, eyelid and conjunctiva (Fig. 8D–G; supplementary material Fig. S7B,C), but observed only occasional nuclear SPDEF expression in the cornea (supplementary material Fig. S7E). SPDEF expression was limited to goblet cell nuclei in the conjunctival epithelium in doxycycline-treated *K14-rtTA* littermates (Fig. 8D,E), replicating the normal pattern observed in wild-type animals, as expected (Fig. 7D). Although no ectopic goblet cells were observed in the skin or cornea of doxycycline-induced adult *K14-rtTA* $\times$ *TRE2-Spdef* mice (supplementary material Fig. S7B–E), clusters of ectopic goblet cells were found interspersed in the eyelid epithelium and in the peripheral cornea (Fig. 8F–K; supplementary material Fig. S8), indicating that overexpression of SPDEF is sufficient to drive goblet cell differentiation in adult K14-positive ocular epithelia. Lentiviral-mediated overexpression of

SPDEF (Chen et al., 2009) in K14-positive cells resulted in modest yet significant upregulation of goblet cell-associated genes, such as *Muc5aC*, *Foxa3* and *Gcnt3* (Fig. 8L,M), confirming the *in vivo* observation that SPDEF is sufficient for goblet cell differentiation in K14-positive stratified epithelia.

#### TGF $\beta$ negatively regulates SPDEF in a Smad3-dependent manner

Because loss of function of *Tgfb2* and gain of function of *Spdef* both resulted in expansion of the goblet cell compartment in the mouse eye, we hypothesized that TGF $\beta$  directly repressed *Spdef* to control goblet cell differentiation. Inspection of the promoter region of the mouse *Spdef* gene revealed five putative Smad-binding elements (SBE) that are evolutionarily conserved and not found in repeat regions of the genome (Fig. 9A). Four of these sites contained the consensus SBE sequence GTCT (sites 1–4) (Derynck et al., 1998; Massague and Wotton, 2000), whereas one site (site 5) contained the consensus repressive SBE sequence GNNTTGGNGN (Kerr et al., 1990; Frederick et al., 2004). We performed chromatin immunoprecipitation to determine whether Smad3, a canonical effector of TGF $\beta$  signaling, bound the potential SBE in the *Spdef* promoter. Smad3 bound to the *Spdef* promoter at sites 3 and 5, but not sites 1, 2 or 4 (Fig. 9B), indicating that *Spdef* may be a previously unidentified target of TGF $\beta$  signaling. To test directly whether TGF $\beta$  regulated the transcriptional activity of *Spdef*, we performed luciferase reporter assays. Overexpression of Smad3 in K14-positive cells and treatment with TGF $\beta$  resulted in an 85% reduction in luciferase activity driven by 7 kb of the mouse *Spdef* promoter (Fig. 9C). In parallel, we performed these luciferase promoter assays using K14-positive cells from *Tgfb2*

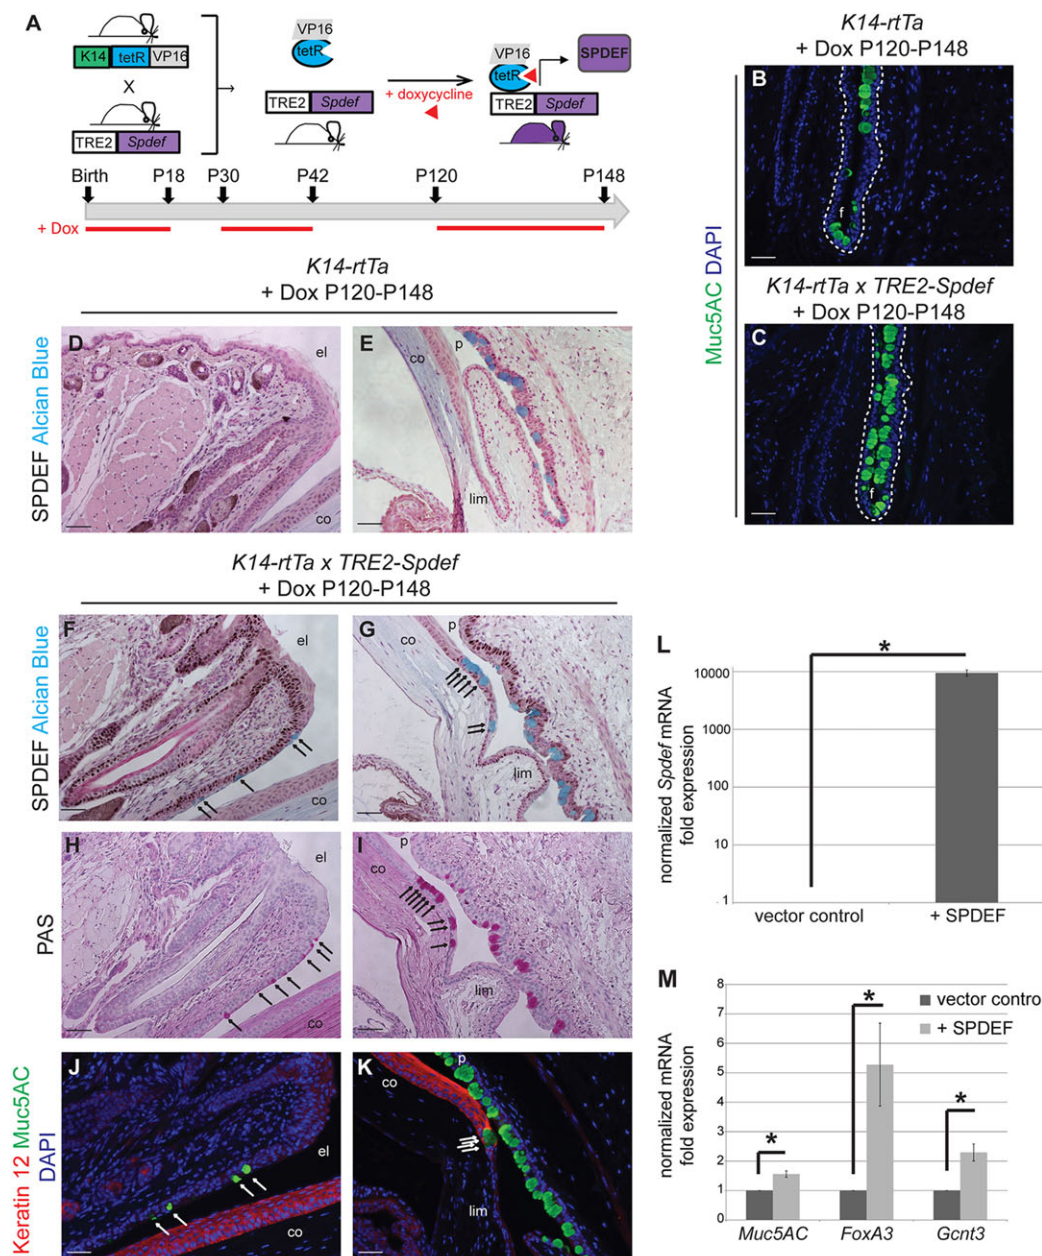

**Fig. 8. Overexpression of SPDEF in K14-positive epithelium results in ectopic goblet cell formation *in vivo* and upregulation of goblet cell-associated genes *in vitro*.** (A) *K14-rtTA* mice were crossed to *TRE2-Spdef* mice and fed doxycycline to induce SPDEF expression in K14-positive epithelium at three different timepoints (P0, P30 and P120), and analyzed at P18, P42 and P148, respectively. (B,C) Immunofluorescence staining with an antibody against Muc5AC revealed that adult *K14-rtTA* × *TRE2-Spdef* mice (C), which were induced with doxycycline from P120 to P148, exhibited increased goblet cell density in the conjunctival fornix, compared with *K14-rtTA* control littermates (B). Dotted lines indicate the basal layer. (D-E) Immunohistochemistry with an antibody against SPDEF revealed that adult *K14-rtTA* control mice expressed SPDEF exclusively in the nuclei of conjunctival goblet cells (D,E). However, adult *K14-rtTA* × *TRE2-Spdef* mice, induced at P120, expressed SPDEF abundantly throughout eyelid epithelium and conjunctival epithelium (F,G), and formed ectopic Alcian Blue-positive goblet cells in the eyelid epithelium (arrows, F) and peripheral cornea (arrows, G), which also expressed PAS (H,I, arrows) and Muc5AC (J,K, arrows). (J,K) Co-immunofluorescence staining with an antibody against keratin 12 revealed goblet cells in the keratin 12-positive peripheral corneal epithelium. (L,M) Lentiviral infection of K14-positive cells with the full-length *Spdef* gene resulted in a 10,000-fold enrichment of *Spdef* mRNA compared with cells infected with empty vector control ( $*P=0.00004$ ) (L), and significantly upregulated genes associated with goblet cell differentiation, including *Muc5aC* ( $*P=0.00005$ ), *Foxa3* ( $*P=0.006$ ) and *Gcnt3* ( $*P=0.002$ ) (M). Data represent the mean ± s.d.; Student's *t*-test. Scale bars: 50  $\mu$ m. f, fornix; el, eyelid; co, cornea; p, palpebral conjunctiva; lim, limbus.

cKO mice and found no change in the transcriptional activity of *Spdef* after treatment with TGF $\beta$  (Fig. 9C), indicating that loss of TGF $\beta$ RII abolishes regulation of *Spdef* in response to TGF $\beta$  signaling. Taken together, these data indicate that TGF $\beta$ RII is essential for modulating *Spdef* expression and goblet cell differentiation in K14-positive cells.

## DISCUSSION

### Loss of TGF $\beta$ signaling in the ocular surface epithelium is not sufficient to drive carcinogenesis

Present findings elucidate a new role for TGF $\beta$  signaling in the ocular surface epithelium. We found that loss of TGF $\beta$  signaling in the conjunctiva results in goblet cell expansion and conjunctival



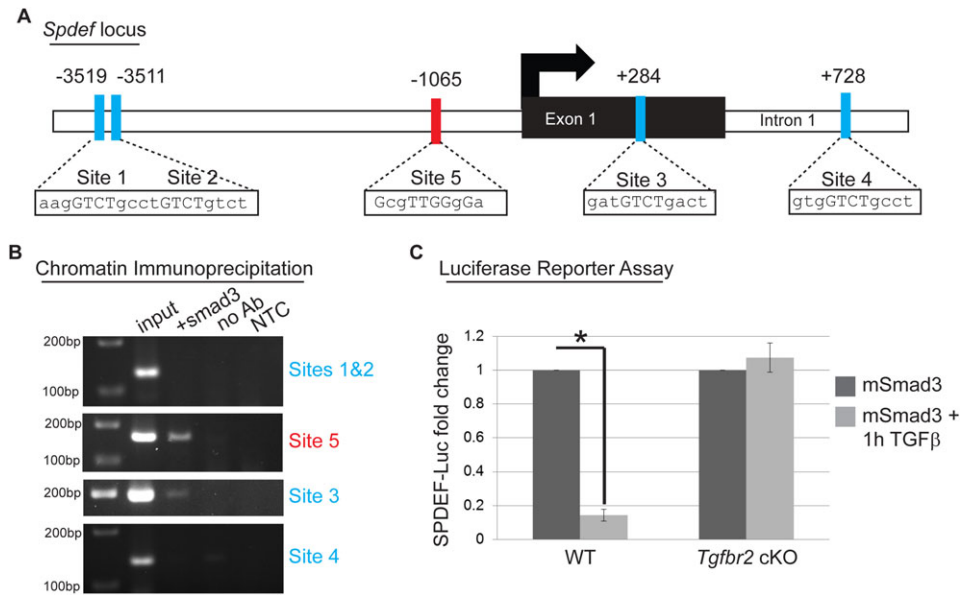

**Fig. 9. TGF $\beta$  negatively regulates SPDEF in a Smad3-dependent manner.** (A) Promoter analysis using MatInspector (Genomatrix) revealed five putative Smad-binding elements (SBEs) in the *Spdef* promoter, including four SBEs containing the consensus sequence GNTTGGNGN (sites 1–4), and one repressive SBE containing the consensus sequence GNNTTGGNGN (site 5). All five sites are evolutionarily conserved and are not within repeat regions. Sites 1 and 2 are located 3511 bp upstream of the transcription start site (TSS, black arrow) of the *Spdef* gene. Site 3 is located within exon 1 of the *Spdef* gene and Site 4 is located within the first intron of the *Spdef* gene. The inhibitory Site 5 is located 1065 bp upstream of the TSS of *Spdef*. (B) Chromatin immunoprecipitation with an anti-Smad3 antibody was used to isolate DNA fragments that were amplified by primers designed to flank sites 3 and 5 in the *Spdef* promoter, but not sites 1 and 2 or site 4 after overexpressing Smad3 in NIH3T3 cells and treating with TGF $\beta$ 1 (2 ng/ml) for 24 h. Non-template (NTC) and no-antibody (no Ab) controls were used to verify the specificity of binding. (C) SPDEF-Luciferase activity was reduced by 85% after overexpressing Smad3 in wild-type keratinocytes and treating with TGF $\beta$ 1 (2 ng/ml) for 1 h compared with transfected cells without treatment. SPDEF-Luciferase activity was unchanged in *Tgfr2* cKO keratinocytes overexpressing Smad3 and treated with TGF $\beta$ 1 (2 ng/ml) for 1 h compared with untreated *Tgfr2* cKO keratinocytes. Data represent the mean $\pm$ s.d.; Student's *t*-test, \**P*=0.000002.

epithelial hyperplasia. TGF $\beta$  signaling has been widely implicated in cancer, and can function as both a tumor suppressor and tumor promoter. Loss of either Smad3 (Maggio-Price et al., 2006) or Smad4 (Takaku et al., 1999), the common mediator Smad, has been reported to cause gastric and duodenal mucinous adenocarcinoma, characterized by an abundance of goblet cells. Similarly, mucinous squamous cell carcinoma-like tumors have been reported in the periorbital region when  $\alpha$ v-integrin, a cell-surface protein that interacts with TGF $\beta$  in the extracellular matrix, is conditionally deleted using a neuronal specific *GFAP-Cre* recombinase (McCarty et al., 2008). Transition zones are unique regions between two distinct types of epithelia (McNairn and Guasch, 2011), which develop spontaneous malignant tumors when TGF $\beta$  is compromised. These spontaneous tumors occur at the anorectal (Guasch et al., 2007; Honjo et al., 2007; Yoshinaga et al., 2008), the gastrointestinal (Bleuming et al., 2007) and the gastric transition zones (Nam et al., 2012). Loss of TGF $\beta$  signaling is not sufficient on its own to cause spontaneous tumors in non-transition zone epithelia, including the tongue (Bian et al., 2009), the skin (Guasch et al., 2007), the pancreas (Ijichi et al., 2006), the intestine (Takaku et al., 1999) or the colon (Maggio-Price et al., 2006), in which additional insults are required to drive carcinogenesis. Intriguingly, the limbal transition zone is highly susceptible to tumor formation in humans (Lavker et al., 2004), but a link to loss of TGF $\beta$  signaling has not been established. The goblet cell expansion and conjunctival epithelial hyperplasia observed in our *Tgfr2* cKO mice does not have the morphological features indicative of a malignant lesion, and maintains an intact basement membrane. Moreover, no invasive tumor was detected in the limbus, supporting the concept that consequences of epithelial TGF $\beta$  deficiency differ contextually. Our results indicate that loss of

TGF $\beta$  signaling in the ocular surface epithelium is sufficient to promote epithelial hyperplasia and goblet cell differentiation but is not sufficient for progression to carcinoma.

#### A new role for TGF $\beta$ in regulating cellular differentiation

This is the first report of TGF $\beta$  directly regulating goblet cell differentiation in any system, although TGF $\beta$  has an established role in controlling differentiation in other epithelia. In the sebaceous (McNairn et al., 2013b) and salivary (Janebodoin et al., 2013) glands, inhibition of TGF $\beta$  signaling *in vitro* results in an increase of differentiated, mature structures. Our findings support this trend, by which the loss of TGF $\beta$  signaling in the conjunctival epithelium results in an expansion of differentiated goblet cells. Although it is known that goblet cells and stratified conjunctival epithelial cells share a common progenitor (Wei et al., 1997; Pellegrini et al., 1999), definitive goblet cell precursor cells have not been identified. We found strong nuclear expression of SPDEF in both goblet cells as well as stratified conjunctival epithelial cells in *Tgfr2* cKO mice, but only detected SPDEF in the nuclei of goblet cells in wild-type conjunctiva. Transgenic overexpression of SPDEF in adult K14-positive epithelium resulted in abundant nuclear SPDEF expression in the skin, eyelid and conjunctiva; however, we did not observe ectopic goblet cell formation in the skin, suggesting that the skin is a specialized type of epithelium that uses mechanisms to control cellular differentiation that differ from mechanisms operating in the ocular surface epithelium. SPDEF was only sporadically expressed in the nuclei of the corneal epithelium, indicating that, although the cornea is derived from K14-expressing cells, K14 may not be the most efficient driver for transgenic studies involving the cornea. However, transgenic

overexpression of SPDEF was sufficient to drive goblet cell metaplasia in the eyelid epithelium and the peripheral cornea, similar to the mechanism of goblet cell metaplasia described in the lung (Park et al., 2007; Chen et al., 2009) and the intestine (Noah et al., 2010), indicating that SPDEF is sufficient to drive goblet cell differentiation in some K14-positive ocular cell types. Only a subset of SPDEF-expressing K14-positive epithelial cells underwent metaplasia into goblet cells *in vivo*, suggesting that these epithelia employ additional mechanisms to restrict goblet cell differentiation. Our data demonstrate that TGF $\beta$  is one such factor required for restriction of goblet cell differentiation in adult mice, and that it acts upstream of *Spdef*.

### TGF $\beta$ is a novel regulator of SPDEF

We found that Smad3 bound two distinct sites on the *Spdef* promoter and that treatment of K14-positive cells with TGF $\beta$  inhibited SPDEF activation, thereby identifying a novel mechanistic role for TGF $\beta$  in the regulation of goblet cell differentiation. Although the role of *Spdef* in goblet cell differentiation is consistent between the lung, the intestine and the conjunctiva, transcriptional control of *Spdef* remains unclear, especially in the conjunctiva. Conditional deletion of *Klf4* (Swamynathan et al., 2007; Gupta et al., 2011) or *Klf5* (Kenchegowda et al., 2011), which are structurally related and expressed in the ocular surface epithelium, results in a loss of conjunctival goblet cells and reduced *Spdef* mRNA expression (Gupta et al., 2011; Marko et al., 2013). Gene expression analysis of *Klf4*-deficient mice yielded *Spdef*, but not elements of the TGF $\beta$  signaling pathway, as direct targets of KLF4 in the conjunctiva (Gupta et al., 2011). We detected no change in KLF5 expression in *Tgfb2* cKO conjunctiva, suggesting that TGF $\beta$  may function independently of KLF4/5 in a novel mechanism of transcriptional regulation of goblet cell differentiation. Because SPDEF is required for goblet cell differentiation in many organs, our findings support the concept that TGF $\beta$  may have a more global role in spatial or temporal restriction of goblet cell differentiation.

### TGF $\beta$ as a therapeutic target for human goblet cell pathologies

SPDEF is known to play a role in goblet cell function in humans. SPDEF is expressed in the nuclei of healthy human conjunctival goblet cells, and samples obtained from individuals with Sjögren's syndrome, an autoimmune disorder that causes dry eye, display decreased *Spdef* mRNA expression (Marko et al., 2013). Individuals with Sjögren's syndrome also display hyposalivation and exogenous TGF $\beta$ 1 production in the salivary gland of mice results in a dry mouth phenotype (Hall et al., 2010), supporting the possibility of TGF $\beta$  as a therapeutic target for this type of disorder. Treatment for dry eye, including Sjögren's syndrome, currently relies largely on managing symptoms of disease with artificial tears. Our findings present exciting opportunities for development of therapeutic strategies that target TGF $\beta$  signaling to treat disorders of goblet cell differentiation, including dry eye syndromes, Sjögren's syndrome and mucinous adenocarcinoma, in humans.

## MATERIALS AND METHODS

### Mice and genotyping

The conditional knockout *Tgfb2<sup>fllox/fllox</sup>×K14-Cre* mouse model (Leveen et al., 2002; Guasch et al., 2007) is derived in a pure C57BL/6 background and backcrossed (McCauley and Guasch, 2013) into a mouse reporter containing an enhanced yellow fluorescent protein gene (EYFP) inserted into the *Gt(ROSA)26Sor* locus (Srinivas et al., 2001) and called

*R26R-eYFP<sup>fllox-STOP-fllox</sup>* (Jackson Laboratory). Control mice were either *Tgfb2<sup>fllox/fllox</sup>×R26R-eYFP<sup>fllox-STOP-fllox</sup>* or *Tgfb2<sup>+/+</sup>×R26R-eYFP<sup>fllox-STOP-fllox</sup>×K14-Cre*, all in a C57BL/6 background.

Mice expressing SPDEF were in a mixed background and were generated by crossing *K14-rtTA* mice (Nguyen et al., 2006) (Jackson Laboratory) with *TRE2-Spdef* mice (Park et al., 2007). Control mice were *K14-rtTA* alone. To induce transgene expression, adult compound transgenic mice were fed with Dox-chow (doxycycline 1 g/kg chow, Bioserv) *ad libitum*. Neonates were administered doxycycline at birth (P0) by feeding the nursing mother with Dox-chow *ad libitum*.

All experiments were approved by the Cincinnati Children's Hospital Research Foundation Institutional Animal Care and Use Committee and were carried out using standard procedures. Genotyping was conducted by PCR of tail skin DNA using mouse *Cre*, *Tgfb2*, *EYFP*, *K14-rtTA* and *TRE2-Spdef* primers, as described previously (Soriano, 1999; Nguyen et al., 2006; Guasch et al., 2007; Park et al., 2007).

### Histological analysis

After sacrificing mice by carbon dioxide inhalation, eyes, including the skin, intact eyelids and eyeball, were dissected and fixed in 4% paraformaldehyde for 48 h. The samples were then dehydrated and embedded in paraffin or cryopreserved in 30% sucrose and embedded in OCT compound (Tissue-Tek), and stored at  $-80^{\circ}\text{C}$  as previously described (McCauley and Guasch, 2013). Deparaffinized sections (5  $\mu\text{m}$ ) were stained with Hematoxylin and Eosin (Ventana Medical Systems), periodic acid-Schiff (PAS; Sigma-Aldrich) or Alcian Blue (Poly Scientific) according to the manufacturer's instructions.

### Immunostainings and antibodies

Deparaffinized tissue sections (5  $\mu\text{m}$ ) were subjected to antigen retrieval and immunostaining as previously described (Tompkins et al., 2009). Frozen tissue sections (10  $\mu\text{m}$ ) were subjected to immunofluorescence labeling as previously described (Runck et al., 2010). Antibodies used and image acquisition are described in the methods in the supplementary material.

### Detection of cellular proliferation

Mice were injected intraperitoneally with 10 mg/ml of 5-bromo-2-deoxyuridine (BrdU, Sigma-Aldrich) 2 h before sacrifice, and eyes were harvested, sectioned and stained as described in the methods in the supplementary material, with additional treatment of slides with 1 N HCl for 40 min at  $37^{\circ}\text{C}$  prior to incubation with antibody against BrdU (Abcam, ab6326, 1/100). The percentages of BrdU-positive cells were determined by counting the total number of nuclei in the basal layer and the number of BrdU-positive basal epithelial cells using a 40 $\times$  objective in z-stack combined images. Data represent quantification of eyes from three wild-type and six *Tgfb2* cKO mice.

### Fluorescence-activated cell sorting (FACS)

Eyes, including the surrounding skin, intact eyelids and eyeball, were removed from *Tgfb2<sup>fllox/fllox</sup>×R26R-eYFP<sup>fllox-STOP-fllox</sup>×K14-Cre* mice and dissociated into a single cell suspension as previously described (McCauley and Guasch, 2013). Dead cells were excluded using 7-amino-actinomycin D (7-AAD; eBioscience) incorporation and the remaining live YFP-positive and YFP-negative cells were collected directly into cell lysis buffer containing  $\beta$ -mercaptoethanol using a FACS Aria II (BD) and FACSDiva software (BD). Sorted cells were vortexed and stored at  $-80^{\circ}\text{C}$  until RNA extraction.

### Laser-capture microdissection

Eyes were dissected from adult wild-type and *Tgfb2* cKO mice and processed for laser capture microdissection as previously described (Potter and Brunskill, 2012). Once samples were obtained, RNA was isolated using a ZR RNA MicroPrep kit (Zymo Research) and amplified using the Ovation RNA-Seq System V2 (Nugen) according to the manufacturer's directions before being subjected to qPCR as described below.

### Real-time PCR

Total RNA was isolated using a Qiagen RNeasy Mini Kit and used to produce cDNA (Maxima first strand cDNA synthesis kit, Fermentas).

Real-time PCR was performed using the CFX96 real-time PCR System, CFX Manager Software and SsoFast EvaGreen Supermix reagents (Bio-Rad) or StepOnePlus real-time PCR system and TaqMan reagents (Applied Biosystems). All reactions were run three times in triplicate and analyzed using the  $\Delta\Delta\text{CT}$  method with relative expression normalized to *Gapdh* or 18S. Primers are described in the methods in the supplementary material.

### Isolation of primary keratinocytes and cell culture

Wild-type and *Tgfb2* cKO keratinocytes were isolated from newborn C57BL/6 mice at P1. Detailed protocol is described in the methods in the supplementary material. Loss of *Tgfb2* has been verified by qPCR and loss of TGF $\beta$  responsiveness confirmed as previously described (Guasch et al., 2007).

### Chromatin immunoprecipitation

NIH3T3 cells were seeded in 10 cm plates at 80% confluence and transiently transfected with a pCMV-driven mouse Smad3 (Sino Biological) using X-treme Gene transfection reagent (Roche Applied Science) for 24 h, then treated with recombinant human TGF $\beta$ 1 (R&D Systems, 2 ng/ml) for an additional 24 h. Cells were crosslinked with 1% formaldehyde and subjected to ChIP using an antibody against Smad3 (Abcam, ab28379) using a ChIP assay kit (Millipore) according to the manufacturer's instructions. After purification, DNA obtained from the ChIP assay was used as PCR templates to verify the interaction between DNA and protein, using primers designed to amplify distinct sites in the mouse *Spdef* promoter. Primers are described in the methods in the supplementary material. PCR products were then subjected to gel electrophoresis on a 3% agarose gel using a molecular weight marker to verify the size of migrating bands.

### Cloning and luciferase reporter assay

Using *SalI* and *EcoRI* restriction enzymes, a 7634 bp fragment of the mouse *Spdef* promoter, containing ~3.7 kb upstream of the transcriptional start site, the first exon (399 bp) and the first intron (~3.5 kb), was isolated from the W11-1250E21 Fosmid containing the mouse *Spdef* gene (SpectraGenetics). The fragment was gel purified and ends were blunted with Klenow fragment followed by alkaline phosphatase to prevent re-ligation. In parallel, the pGL3 Basic Luciferase Vector (Promega) was cut with the blunt-end cutting *SmaI* restriction enzyme, followed by alkaline phosphatase to prevent re-ligation. The Quick Ligase kit (NEB) was used to combine the opened pGL3 Basic Vector with the 7634 bp *Spdef* fragment, and the resulting ligation was transformed into DH5 $\alpha$  competent cells and selected on LB-ampicillin plates overnight. Colonies were subjected to enzymatic digestion followed by sequencing to confirm the integration.

Primary wild-type and *Tgfb2* cKO keratinocytes were seeded in six-well plates at 80% confluence and were transiently transfected with the pGL3 basic luciferase vector containing 7634 bp of the mouse *Spdef* promoter and pCMV-mSmad3 (Sino Biological) using X-treme gene transfection reagent (Roche Applied Science). The pcDNA3.1 empty vector and pCMV- $\beta$ -galactosidase vector (Addgene) were used to normalize total DNA and transfection efficiency, respectively. A *Foxa3* expression vector (Chen et al., 2009, 2014) was used as a positive control. Forty-eight hours after transfection, cells were treated with recombinant human TGF $\beta$ 1 (R&D Systems, 2 ng/ml) for 1 h at 37°C before measuring luciferase activity using a Luciferase Assay System kit (Promega). Experiments were performed three times in triplicate and statistical significance was determined using a paired two-tailed Student's *t*-test.

The SPDEF-expressing lentivirus has been previously described (Chen et al., 2009). Seventy-two hours after infection, cells were trypsinized and GFP $^+$  cells were isolated by FACS and processed for RNA extraction and qPCR.

### Acknowledgements

We thank Dr Abbot Spaulding and Dr Keith Stringer for initial pathological interpretations; Angie Keiser and Joe Kitzmiller for assisting with the KLF5 and SPDEF immunohistochemistry; Andrew Potter for assisting with laser-capture microdissection; and Dr Anil Jegga for expertise in analyzing the *Spdef* promoter.

### Competing interests

The authors declare no competing financial interests.

### Author contributions

H.A.M., C.-Y.L. and G.G. conceived and designed the experiments; H.A.M., C.-Y.L., A.C.A., Y.Z. and G.G. performed the experiments; H.A.M., C.-Y.L., K.A.W.-B., J.A.W. and G.G. analyzed the data; and H.A.M. and G.G. wrote the paper.

### Funding

All flow cytometric data were acquired using equipment maintained by the Research Flow Cytometry Core in the Division of Rheumatology at Cincinnati Children's Hospital Medical Center, supported in part by the National Institutes of Health (NIH) [AR-47363, DK78392 and DK90971]. This work was supported by grants from the V Foundation and the Sidney Kimmel Foundation (G.G.), and the NIH [EY21501 to C.-Y.L. and Heart, Lung and Blood Institute HL095580 to J.A.W.]. Deposited in PMC for release after 12 months.

### Supplementary material

Supplementary material available online at <http://dev.biologists.org/lookup/suppl/doi:10.1242/dev.117804/-DC1>

### References

- Aronson, B. E., Stapleton, K. A., Vissers, L. A. T. M., Stokhuijzen, E., Bruijnzeel, H. and Krasinski, S. D. (2014). *Spdef* deletion rescues the crypt cell proliferation defect in conditional *Gata6* null mouse small intestine. *BMC Mol. Biol.* **15**, 3.
- Barsky, S., Siegal, G., Jannotta, F. and Liotta, L. (1983). Loss of basement membrane components by invasive tumors but not by their benign counterparts. *Lab. Invest.* **49**, 140-147.
- Bian, Y., Terse, A., Du, J., Hall, B., Molinolo, A., Zhang, P., Chen, W., Flanders, K. C., Gutkind, J. S., Wakefield, L. M. et al. (2009). Progressive tumor formation in mice with conditional deletion of TGF- $\beta$  signaling in head and neck epithelia is associated with activation of the PI3K/Akt pathway. *Cancer Res.* **69**, 5918-5926.
- Bleuming, S. A., He, X. C., Kodach, L. L., Hardwick, J. C., Koopman, F. A., ten Kate, F. J., van Deventer, S. J. H., Hommes, D. W., Peppelenbosch, M. P., Offerhaus, G. J. et al. (2007). Bone morphogenetic protein signaling suppresses tumorigenesis at gastric epithelial transition zones in mice. *Cancer Res.* **67**, 8149-8155.
- Chen, G., Korfhagen, T. R., Xu, Y., Kitzmiller, J., Wert, S. E., Maeda, Y., Gregorieff, A., Clevers, H. and Whitsett, J. A. (2009). SPDEF is required for mouse pulmonary goblet cell differentiation and regulates a network of genes associated with mucus production. *J. Clin. Invest.* **119**, 2914-2924.
- Chen, G., Korfhagen, T. R., Karp, C. L., Impey, S., Xu, Y., Randell, S. H., Kitzmiller, J., Maeda, Y., Haitchi, H. M., Sridharan, A. et al. (2014). Foxa3 induces goblet cell metaplasia and inhibits innate antiviral immunity. *Am. J. Respir. Crit. Care Med.* **189**, 301-313.
- Corne, D., Jamin, C. and Pers, J.-O. (2014). Sjogren's syndrome: where do we stand, and where shall we go? *J. Autoimmun.* **51**, 109-114.
- DePaiva, C. S., Volpe, E. A., Gandhi, N. B., Zhang, X., Zheng, X., Pitcher, J. D., III, Farley, W. J., Stern, M. E., Niederhorn, J. Y., Li, D.-Q. et al. (2011). Disruption of TGF- $\beta$  signaling improves ocular surface epithelial disease in experimental autoimmune keratoconjunctivitis sicca. *PLoS ONE* **6**, 1-9.
- Derynck, R., Zhang, Y. and Feng, X.-H. (1998). Transcriptional activators of TGF- $\beta$  responses: Smads. *Cell* **95**, 737-740.
- Feng, X.-H. and Derynck, R. (2005). Specificity and versatility in TGF- $\beta$  signaling through smads. *Annu. Rev. Cell Dev. Biol.* **21**, 659-693.
- Frederick, J. P., Liberati, N. T., Waddell, D. S., Shi, Y. and Wang, X.-F. (2004). Transforming growth factor  $\beta$ -mediated transcriptional repression of c-myc is dependent on direct binding of smad3 to a novel repressive smad binding element. *Mol. Cell. Biol.* **24**, 2546-2559.
- Gregorieff, A., Stange, D. E., Kujala, P., Begthel, H., van den Born, M., Korving, J., Peters, P. J. and Clevers, H. (2009). The Ets-domain transcription factor *Spdef* promotes maturation of goblet and paneth cells in the intestinal epithelium. *Gastroenterology* **137**, 1333-1345.e3.
- Guasch, G., Schober, M., Pasolli, H. A., Conn, E. B., Polak, L. and Fuchs, E. (2007). Loss of TGF $\beta$  signaling destabilizes homeostasis and promotes squamous cell carcinomas in stratified epithelia. *Cancer Cell* **12**, 313-327.
- Gupta, D., Harvey, S. A. K., Kaminski, N. and Swamynathan, S. K. (2011). Mouse conjunctival fornix gene expression during postnatal development and its regulation by Kruppel-like factor 4. *Invest. Ophthalmol. Vis. Sci.* **52**, 4951-4962.
- Hall, B. E., Zheng, C., Swaim, W. D., Cho, A., Naginei, C. N., Eckhaus, M. A., Flanders, K. C., Ambudkar, I. S., Baum, B. J. and Kulkarni, A. B. (2010). Conditional overexpression of TGF- $\beta$ 1 disrupts mouse salivary gland development and function. *Lab. Invest.* **90**, 543-555.
- Honjo, Y., Bian, Y., Kawakami, K., Molinolo, A., Longenecker, G., Boppana, R., Larsson, J., Karlsson, S., Gutkind, J. S., Puri, R. K. et al. (2007). TGF- $\beta$  receptor I conditional knockout mice develop spontaneous squamous cell carcinoma. *Cell Cycle* **6**, 1360-1366.
- Huang, J., Dattilo, L. K., Rajagopal, R., Liu, Y., Kaartinen, V., Mishina, Y., Deng, C.-X., Umans, L., Zwijssen, A., Roberts, A. B. et al. (2009). FGF-regulated BMP signaling is required for eyelid closure and to specify conjunctival epithelial cell fate. *Development* **136**, 1741-1750.

- Ijichi, H., Chytil, A., Gorska, A. E., Aakre, M. E., Fujitani, Y., Fujitani, S., Wright, C. V. E. and Moses, H. L. (2006). Aggressive pancreatic ductal adenocarcinoma in mice caused by pancreas-specific blockade of transforming growth factor- $\beta$  signaling in cooperation with active Kras expression. *Genes Dev.* **20**, 3147–3160.
- Janebodin, K., Buranaphatthana, W., Ieronimakis, N., Hays, A. L. and Reyes, M. (2013). An *in vitro* culture system for long-term expansion of epithelial and mesenchymal salivary gland cells: role of TGF- $\beta$ 1 in salivary gland epithelial and mesenchymal differentiation. *BioMed Res. Int.* **2013**, 1–20.
- Kenchegowda, D., Swamynathan, S., Gupta, D., Wan, H., Whitsett, J. and Swamynathan, S. K. (2011). Conditional disruption of mouse Klf5 results in defective eyelids with malformed meibomian glands, abnormal cornea and loss of conjunctival goblet cells. *Dev. Biol.* **356**, 5–18.
- Kerr, L. D., Miller, D. B. and Matrisian, L. M. (1990). TGF- $\beta$ 1 inhibition of transin/stromelysin gene expression is mediated through a Fos binding sequence. *Cell* **61**, 267–278.
- Lavker, R. M., Tseng, S. C. G. and Sun, T.-T. (2004). Corneal epithelial stem cells at the limbus: looking at some old problems from a new angle. *Exp. Eye Res.* **78**, 433–446.
- Leveen, P., Larsson, J., Ehinger, M., Cilio, C. M., Sundler, M., Sjostrand, L. J., Holmdahl, R. and Karlsson, S. (2002). Induced disruption of the transforming growth factor b type II receptor gene in mice causes a lethal inflammatory disorder that is transplantable. *Blood* **100**, 560–568.
- Li, W., Chen, Y.-T., Hayashida, Y., Blanco, G., Kheirkah, A., He, H., Chen, S.-Y., Liu, C.-Y. and Tseng, S. C. G. (2007). Down-regulation of *Pax6* is associated with abnormal differentiation of corneal epithelial cells in severe ocular surface diseases. *J. Pathol.* **214**, 114–122.
- Lu, S.-L., Herrington, H., Reh, D., Weber, S., Bornstein, S., Wang, D., Li, A. G., Tang, C.-F., Siddiqui, Y., Nord, J. et al. (2006). Loss of transforming growth factor- $\beta$  type II receptor promotes metastatic head-and-neck squamous cell carcinoma. *Genes Dev.* **20**, 1331–1342.
- Maggio-Price, L., Treuting, P., Zeng, W., Tsang, M., Bielefeldt-Ohmann, H. and Iritani, B. M. (2006). Helicobacter infection is required for inflammation and colon cancer in Smad3-deficient mice. *Cancer Res.* **66**, 828–838.
- Mantelli, F. and Argüeso, P. (2008). Functions of ocular surface mucins in health and disease. *Curr. Opin. Allergy Clin. Immunol.* **8**, 477–483.
- Marko, C. K., Menon, B. B., Chen, G., Whitsett, J. A., Clevers, H. and Gipson, I. K. (2013). *Spdef* null mice lack conjunctival goblet cells and provide a model of dry eye. *Am. J. Pathol.* **183**, 35–48.
- Massagué, J. and Wotton, D. (2000). Transcriptional control by the TGF- $\beta$ /Smad signaling system. *EMBO J.* **19**, 1745–1754.
- McCarty, J. H., Barry, M., Crowley, D., Bronson, R. T., Lacy-Hulbery, A. and Hynes, R. O. (2008). Genetic ablation of  $\alpha$ v integrins in epithelial cells of the eyelid skin and conjunctiva leads to squamous cell carcinoma. *Am. J. Pathol.* **172**, 1740–1747.
- McCauley, H. A. and Guasch, G. (2013). Serial orthotopic transplantation of epithelial tumors in single-cell suspension. *Methods Mol. Biol.* **1035**, 231–245.
- McNairn, A. J. and Guasch, G. (2011). Epithelial transition zones: merging microenvironments, niches, and cellular transformation. *Eur. J. Dermatol.* **21**, 21–28.
- McNairn, A. J., Brusadelli, M. and Guasch, G. (2013a). Signaling moderation: TGF- $\beta$  in exocrine gland development, maintenance, and regulation. *Eur. J. Dermatol.* **23**, 31–38.
- McNairn, A. J., Doucet, Y., Demaude, J., Brusadelli, M., Gordon, C. B., Uribe-Rivera, A., Lambert, P. F., Bouez, C., Breton, L. and Guasch, G. (2013b). TGF $\beta$  signaling regulates lipogenesis in human sebaceous glands. *BMC Dermatol.* **13**, 2.
- Nam, K. T., O'Neal, R., Lee, Y. S., Lee, Y. C., Coffey, R. J. and Goldenring, J. R. (2012). Gastric tumor development in Smad3-deficient mice initiates from forestomach/glandular transition zone along the lesser curvature. *Lab. Invest.* **92**, 883–895.
- Nguyen, H., Rendl, M. and Fuchs, E. (2006). Tcf3 governs stem cell features and represses cell fate determination in skin. *Cell* **127**, 171–183.
- Noah, T. K., Kazanjian, A., Whitsett, J. and Shroyer, N. F. (2010). SAM pointed domain ETS factor (SPDEF) regulates terminal differentiation and maturation of intestinal goblet cells. *Exp. Cell Res.* **316**, 452–465.
- Ouyang, H., Xue, Y., Lin, Y., Zhang, X., Xi, L., Patel, S., Cai, H., Luo, J., Zhang, M., Zhang, M. et al. (2014). WNT7A and PAX6 define corneal epithelium homeostasis and pathogenesis. *Nature* **511**, 358–361.
- Pajooesh-Ganji, A., Pal-Ghosh, S., Tadvalkar, G. and Stepp, M. A. (2012). Corneal goblet cells and their niche: implications for corneal stem cell deficiency. *Stem Cells* **30**, 2032–2043.
- Park, K.-S., Korfhagen, T. R., Bruno, M. D., Kitzmiller, J. A., Wan, H., Wert, S. E., Hershey, G. K. K., Chen, G. and Whitsett, J. A. (2007). SPDEF regulates goblet cell hyperplasia in the airway epithelium. *J. Clin. Invest.* **117**, 978–988.
- Pellegrini, G., Golisano, O., Paterna, P., Lambiase, A., Bonini, S., Rama, P. and De Luca, M. (1999). Location and clonal analysis of stem cells and their differentiated progeny in the human ocular surface. *J. Cell Biol.* **145**, 769–782.
- Potter, S. S. and Brunskill, E. W. (2012). Laser capture. *Methods Mol. Biol.* **886**, 211–221.
- Radtke, F. and Clevers, H. (2005). Self-renewal and cancer of the gut: two sides of a coin. *Science* **307**, 1904–1909.
- Ren, X., Shah, T. A., Ustiyani, V., Zhang, Y., Shinn, J., Chen, G., Whitsett, J. A., Kalin, T. V. and Kalinichenko, V. V. (2013). FOXM1 promotes allergen-induced goblet cell metaplasia and pulmonary inflammation. *Mol. Cell Biol.* **33**, 371–386.
- Runck, L. A., Kramer, M., Ciralo, G., Lewis, A. G. and Guasch, G. (2010). Identification of epithelial label-retaining cells at the transition between the anal canal and rectum in mice. *Cell Cycle* **9**, 3039–3045.
- Soriano, P. (1999). Generalized lacZ expression with the ROSA26 Cre reporter strain. *Nat. Genet.* **21**, 70–71.
- Srinivas, S., Watanabe, T., Lin, C.-S., Williams, C. M., Tanabe, Y., Jessell, T. M. and Constantini, F. (2001). Cre reporter strains produced by targeted insertion of EYFP and ECFP into the ROSA26 locus. *BMC Dev. Biol.* **1**, 4.
- Swamynathan, S. K. (2013). Ocular surface development and gene expression. *J. Ophthalmol.* **2013**, 1–22.
- Swamynathan, S. K., Katz, J. P., Kaestner, K. H., Ashery-Padan, R., Crawford, M. A. and Piatigorsky, J. (2007). Conditional deletion of the mouse *Klf4* gene results in corneal epithelial fragility, stromal edema, and loss of conjunctival goblet cells. *Mol. Cell Biol.* **27**, 182–194.
- Takaku, K., Miyoshi, H., Matsunaga, A., Oshima, M., Sasaki, N. and Taketo, M. M. (1999). Gastric and duodenal polyps in Smad4 (*Dpc4*) knockout mice. *Cancer Res.* **59**, 6113–6117.
- Terai, K., Call, M. K., Liu, H., Saika, S., Liu, C.-Y., Hayashi, Y., Chikama, T.-I., Zhang, J., Terai, N., Kao, C. W.-C. et al. (2011). Crosstalk between TGF- $\beta$  and MAPK signaling during corneal wound healing. *Invest. Ophthalmol. Vis. Sci.* **52**, 8208–8215.
- Tompkins, D. H., Besnard, V., Lange, A. W., Wert, S. E., Keiser, A. R., Smith, A. N., Lang, R. and Whitsett, J. A. (2009). Sox2 is required for maintenance and differentiation of bronchiolar Clara, ciliated, and goblet cells. *PLoS ONE* **4**, e8248.
- Wei, Z.-G., Wu, R.-L., Lavker, R. M. and Sun, T.-T. (1993). *In vitro* growth and differentiation of rabbit bulbar, fornix, and palpebral conjunctival epithelia. *Invest. Ophthalmol. Vis. Sci.* **34**, 1814–1828.
- Wei, Z.-G., Cotsarelis, G., Sun, T.-T. and Lavker, R. M. (1995). Label-retaining cells are preferentially located in fornical epithelium: implications on conjunctival epithelial homeostasis. *Invest. Ophthalmol. Vis. Sci.* **36**, 236–246.
- Wei, Z.-G., Lin, T., Sun, T.-T. and Lavker, R. M. (1997). Clonal analysis of the *in vivo* differentiation potential of keratinocytes. *Invest. Ophthalmol. Vis. Sci.* **38**, 753–761.
- Yoshinaga, K., Obata, H., Jurukovski, V., Mazzieri, R., Chen, Y., Zilberberg, L., Huso, D., Melamed, J., Prijatelj, P., Todorovic, V. et al. (2008). Perturbation of transforming growth factor (TGF)- $\beta$ 1 association with latent TGF- $\beta$  binding protein yields inflammation and tumors. *Proc. Natl. Acad. Sci. USA* **105**, 18758–18763.
- Zhang, Y., Lam, O., Nguyen, M.-T. T., Ng, G., Pear, W. S., Ai, W., Wang, I.-J., Kao, W. W.-Y. and Liu, C.-Y. (2013). Mastermind-like transcriptional co-activator-mediated Notch signaling is indispensable for maintaining conjunctival epithelial identity. *Development* **140**, 594–605.
